# Supplementary material for: Differential effects of 2-deoxy-D-glucose on in vitro expanded human regulatory T cell subsets
Source: PubMed Central journal article supplement (PMC6553739; doi:10.1371/journal.pone.0217761), 2019-06-06
Supplement: pone.0217761.s003.pdf [file pone.0217761.s003.pdf]

S3 Fig. Effect of dose titration of 2DG on survival and proliferation in Treg subsets

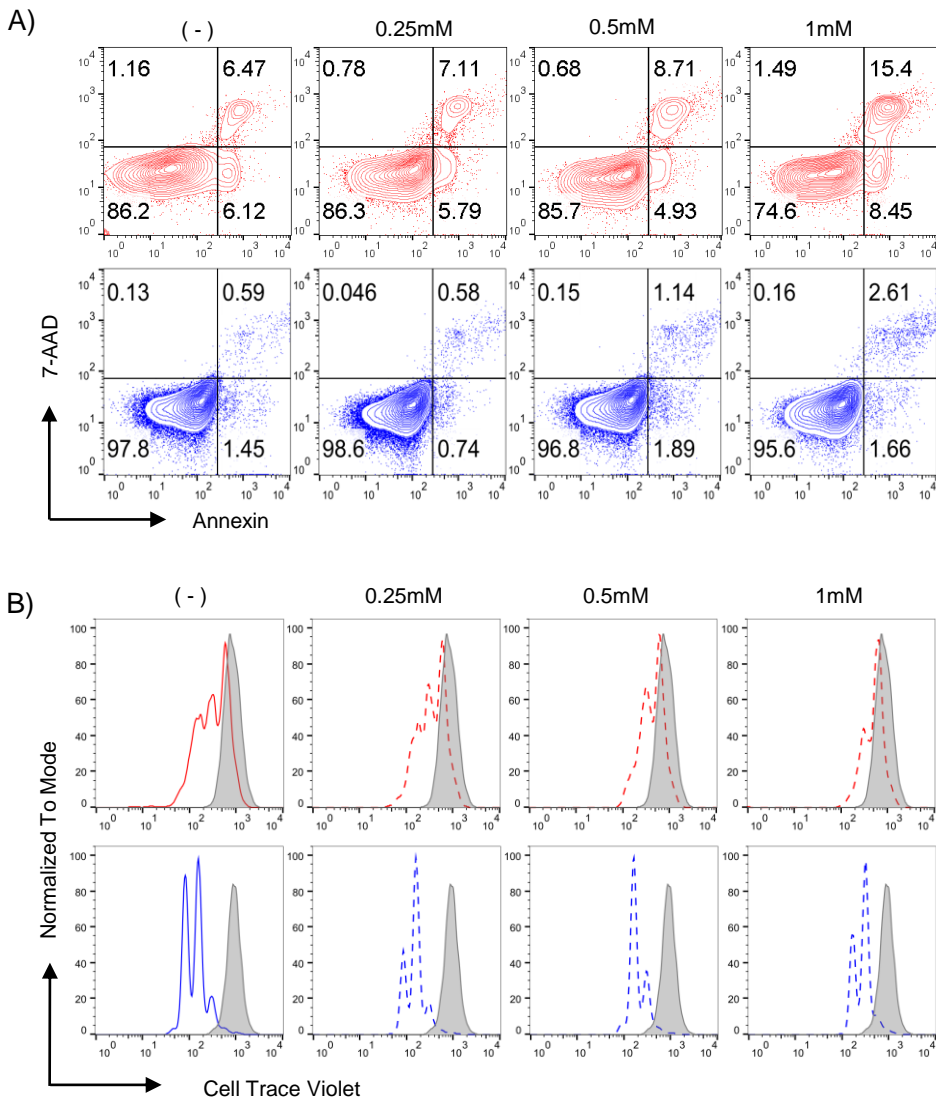

**S3 Fig.** tTreg (red) and iTReg (blue) culturing performed with the indicated dose of 2-deoxy-D-glucose. Cell survival and proliferating status were analyzed at day3 post activation by Annexin-7AAD and cell tracer dilution assay, respectively. Representative data is shown from 2 independent experiments.
