# Supplementary material for: Differential effects of 2-deoxy-D-glucose on in vitro expanded human regulatory T cell subsets
Source: PubMed Central journal article supplement (PMC6553739; doi:10.1371/journal.pone.0217761), 2019-06-06
Supplement: pone.0217761.s004.pdf [file pone.0217761.s004.pdf]

S4 Fig. Inhibiting glycolysis by 2DG specifically suppresses the expression of FOXP3-exon2 variant in iTregs

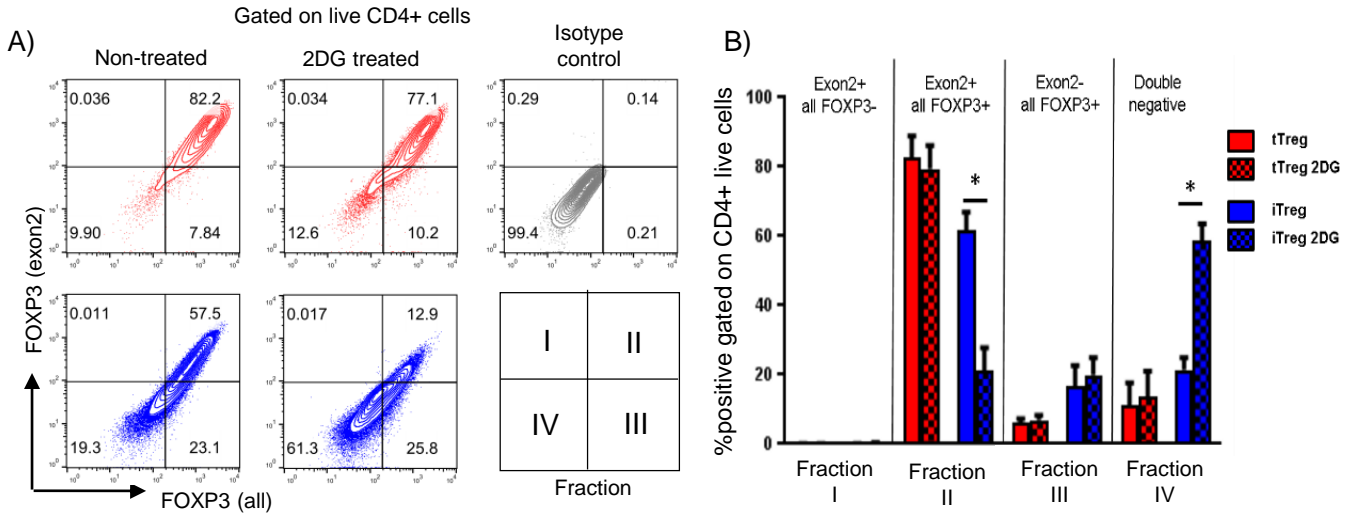

**S4 Fig.** tTreg (red) and iTreg (blue) cultured with or without 0.5mM 2-deoxy-D-glucose (2DG) at culture onset and analyzed at post day3 activation. (A) Co-staining analyses with FOXP3 exon2 specific (D150/E4) and all FOXP3 (PCH101) mAbs are shown in representative counter plot with isotype control (gray). (B) Bar graphs show the distribution in fraction I - IV defined by quadrant in counter plot, respectively (n = 5 form 3 independent experiments). Statistical analysis shown only on significant data (\*P<0.05, One way ANOVA followed by Tukey's multiple comparison).
